# Supplementary material for: Historical Investigation of Fowl Adenovirus Outbreaks in South Korea from 2007 to 2021: A Comprehensive Review
Source: MDPI journal article supplement (doi:10.3390/v13112256), 2021-11-10
Supplement: s1 [file s1]

**Supplementary table 1** Number of reported FAdV cases based on each serotype from 2007-2012 and 2020-2021.

| Serotype <sup>a</sup> | 2007           | 2008 | 2009 | 2010 | 2011 | 2012 | 2020 | 2021 |
|-----------------------|----------------|------|------|------|------|------|------|------|
| <b>4</b>              | 5              | 7    | 18   | 17   | 17   | 21   | 2    | 1    |
| <b>8b</b>             | - <sup>b</sup> | 1    | -    | 3    | -    | -    | 14   | 8    |
| <b>11</b>             | 1              | 3    | 4    | 3    | -    | 3    | 6    | 1    |
| <b>Total</b>          | 6              | 11   | 22   | 23   | 17   | 24   | 22   | 10   |

<sup>a</sup>Data here provided by courtesy of Avinext LTD, Cheongju, South Korea.

<sup>b</sup> Not reported
