# Supplementary material for: Historical Investigation of Fowl Adenovirus Outbreaks in South Korea from 2007 to 2021: A Comprehensive Review
Source: Viruses. 2021 Nov 10;13(11):2256. doi: 10.3390/v13112256 (PMC8621494; doi:10.3390/v13112256)
Supplement: Supplementary file 1 [file viruses-13-02256-s001.zip › Supplementary Table 2 (R3).xlsx]

## Sheet: 2007-2012; 2020-2021
No	Year	Age (Days)	Chicken Type	Serotype	Province	Month submitted
1	2007	4	Broiler	11	Jeonbuk	November
2		93	layer	4	Kyeongnam	November
3		90	layer	4	Kyeongnam	November
4		106	layer	4	Kyeongnam	December
5		90	layer	4	Kyeongnam	December
6		158	layer	4	Kyeongnam	December
7	2008	14	Broiler	11	Kyeonggi	June
8		31	Native chicken	4	Chungnam	June
9		28	Native chicken	4	Chungbuk	June
10		34	Native chicken	4	Chungbuk	June
11		60	Native chicken	4	Chungbuk	July
12		2	Broiler	8	Chungbuk	August
13		12	Broiler	11	Kyeonggi	August
14		44	Native chicken	4	Chungbuk	September
15		15	Broiler	11	Kyeonggi	December
16		1	Broiler	4	Kyeonggi	December
17		16	Broiler	4	Kyeonggi	December
18	2009	33	Broiler	4	Kyeonggi	January
19		17	Broiler	11	Kyeonggi	February
20		17	Broiler	11	Kyeonggi	February
21		16	Broiler	4	Kyeonggi	March
22		18	Broiler	4	Kyeonggi	April
23		29	Native chicken	4	Kyeonggi	April
24		20	Broiler	4	Kyeonggi	June
25		11	Broiler	4	Kyeonggi	June
26		23	Broiler	4	Kyeonggi	July
27		26	Broiler	4	Kyeongnam	July
28		29	Broiler	4	Chungbuk	July
29		29	Broiler	4	Chungbuk	July
30		17	Broiler	11	Jeonbuk	July
31		31	Broiler	4	Jeonbuk	August
32		25	Native chicken	4	Kyeonggi	August
33		90	layer	4	Kyeongnam	August
34		1	layer	4	Kyeonggi	August
35		21	Broiler	4	Kyeonggi	August
36		17	Broiler	11	Kyeongbuk	September
37		19	Broiler	4	Chungnam	September
38		26	Broiler	4	Kyeonggi	November
39		175	Broiler breeder	4	Jeonbuk	December
40	2010	174	layer	4	Kyeongbuk	January
41		29	Broiler	4	Kyeonggi	January
42		14	Broiler	4	Kyeonggi	January
43		66	layer	4	Chungbuk	January
44		81	layer	4	Chungnam	January
45		22	Broiler	4	Chungnam	January
46		235	layer	4	Chungbuk	February
47		13	Broiler	4	Kyeonggi	March
48		30	Broiler	4	Jeonbuk	March
49		21	Broiler	4	Kyeonggi	March
50		14	Broiler	11	Jeonbuk	April
51		18	Broiler	8	Kyeonggi	April
52		21	layer	4	Jeonnam	April
53		14	Broiler	11	Chungnam	May
54		25	Broiler	4	Jeonnam	June
55		15	Broiler	11	Kangwon	July
56		12	Broiler	8	Chungbuk	July
57		32	Broiler	4	Kyeonggi	August
58		34	Broiler	4	Chungbuk	August
59		392	layer	4	Chungnam	August
60		10	Broiler	8	Kyeonggi	August
61		5	Broiler	4	Kyeonggi	September
62		21	Broiler	4	Kyeonggi	December
63	2011	21	Broiler	4	Kyeonggi	January
64		51	Native chicken	4	Chungbuk	May
65		29	Native chicken	4	Chungnam	May
66		18	Broiler	4	Chungbuk	June
67		19	Broiler	4	Kyeonggi	June
68		21	Native chicken	4	Kyeonggi	July
69		46	Broiler	4	Kyeonggi	July
70		36	layer	4	Jeonnam	July
71		18	Broiler	4	Jeonbuk	July
72		11	layer	4	Kyeonggi	September
73		38	Native chicken	4	Chungnam	September
74		70	Native chicken	4	Chungbuk	September
75		160	layer	4	Kyeonggi	October
76		94	layer	4	Kangwon	December
77		18	Broiler	4	Kyeonggi	December
78		3	Broiler	4	Jeonbuk	December
79		3	layer	4	Kyeongnam	December
80	2012	15	Broiler	11	Kyeonggi	January
81		3	Broiler	4	Jeonnam	January
82		24	Broiler	4	Kyeonggi	January
83		5	layer	4	Chungnam	February
84		42	layer	4	Kyeongnam	February
85		142	layer	4	Kyeonggi	February
86		24	layer	4	Kyeonggi	February
87		29	Broiler	4	Kyeonggi	February
88		16	Broiler	4	Kyeongbuk	February
89		61	layer	4	Chungbuk	February
90		20	Broiler	4	Chungbuk	March
91		95	layer	4	Sejong	March
92		181	layer	4	Jeonnam	March
93		124	layer	4	Kyeongbuk	March
94		19	Broiler	4	Kyeonggi	May
95		272	Broiler breeder	4	Chungnam	May
96		45	Native chicken	4	Kangwon	June
97		73	layer	11	Kyeonggi	June
98		277	layer	4	Chungnam	July
99		73	layer	4	Kyeonggi	July
100		32	layer	4	Kangwon	October
101		84	layer	4	Chungnam	October
102		10	Broiler	11	Jeonbuk	November
103		119	layer	4	Kangwon	November
104	2020	18	Broiler	8	Chungnam	January
105		13	Broiler	8	Jeonnam	February
106		8	Broiler	8	Chungbuk	February
107		12	Broiler	8	Kyeongbuk	February
108		24	Broiler	8	Kyeongbuk	March
109		20	Broiler	8	Kyeongbuk	March
110		16	Broiler	8	Chungbuk	March
111		17	Broiler	8	Jeonbuk	March
112		17	Broiler	11	Jeonnam	April
113		21	Broiler	8	Jeonnam	April
114		26	Broiler	8	Kyeonggi	April
115		34	Native chicken	4	Chungnam	June
116		55	Other (black chicken)	4	Chungnam	July
117		8	Broiler	11	Kyeongbuk	July
118		18	Broiler	11	Kyeongbuk	July
119		15	Broiler	8	Jeonnam	July
120		13	Broiler	8	Kyeonggi	August
121		12	Broiler	11	Jeonnam	August
122		14	Broiler	11	Kyeonggi	September
123		17	Broiler	11	Kyeonggi	September
124		17	Broiler	8	Kyeonggi	October
125		7	Broiler	8	Jeonnam	October
126	2021	63	SPF	4	Chungnam	January
127		12	Broiler	8	Jeonbuk	February
128		9	Broiler	8	Chungbuk	March
129		18	Broiler	8	Kyeonggi	March
130		18	Broiler	8	Chungnam	March
131		20	Broiler	8	Chungnam	March
132		15	Broiler	8	Jeonnam	March
133		29	Broiler	8	Chungnam	April
134		14	Broiler	11	Kyeonggi	July
135		8	layer	8	Chungbuk	August
